# Supplementary material for: Shared genetic susceptibilities for irritable bowel syndrome and depressive disorder in Chinese patients uncovered by pooled whole-exome sequencing
Source: PubMed Central journal article supplement — J Adv Res. 2020 Jan 30;23:113–21. doi: 10.1016/j.jare.2020.01.016 (PMC7029050; doi:10.1016/j.jare.2020.01.016), 2020-01-30
Supplement: mmc1.pdf [file mmc1.pdf]

## Supplementary Tables

**Supplementary Table1.** Primer summary for candidate variations

| Primer         | Sequence 5' to 3'      | Length (bp) |
|----------------|------------------------|-------------|
| rs 113527563-F | GGTGTAGCTTATTTTCCGCG   | 275         |
| rs 113527563-R | GATGATGACCAGCTTCGAGAG  |             |
| rs 11570255-F  | GCGCCTGATCTAGGTTTCATG  | 253         |
| rs 11570255-R  | CGTGCGGGTAGTCGTTGC     |             |
| rs 12536873-F  | GGCTGAGTGGGAAGGTGTG    | 182         |
| rs 12536873-R  | CTTGGCATGAGCAGTTGTTG   |             |
| rs 13051496-F  | CACAACCTTTGACACCACCAAG | 296         |
| rs 13051496-R  | AGCAGCAGCCTCTTCTTGG    |             |
| rs 28927681-F  | AGGGTCAAACCAGGCCAG     | 237         |
| rs 28927681-R  | GCCACAGGATTCACCACG     |             |
| rs 3741231-F   | AGCAGGTACCAGTGCTCCAG   | 316         |
| rs 3741231-R   | CCCGTGTTTGACGAGACCT    |             |
| rs 4251691-F   | CTTTGGCTGTGTGCTTGGC    | 353         |
| rs 4251691-R   | TGCACACGGCCATAGAGG     |             |
| rs 6267-F      | GAGTTCATCCTGCAGCCCAT   | 234         |
| rs 6267-R      | GCTTTGATGCCTGGTCCTG    |             |
| rs 8063446-F   | CTCACTTTGCAGGAGCCTG    | 214         |
| rs 8063446-F   | GTAATCTCCGCGCCTCG      |             |

**Supplementary Table 2. Summarize of different genetic model**

| <b>SNVs</b>                  | <b>Allele model</b>     | <b>Dominant model</b> | <b>Recessive model</b> | <b>Homozygous model</b> | <b>Heterozygous model</b> |
|------------------------------|-------------------------|-----------------------|------------------------|-------------------------|---------------------------|
| ANKRD11 rs113527563<br>(G>C) | (GG*2+GC) vs. (CC*2+GC) | (CC+GC) vs. GG        | CC vs. (GC+GG)         | CC vs. GG               | GC vs. GG                 |
| COL6A1 rs13051496 (C>T)      | (CC*2+CT) vs. (TT*2+CT) | (TT+CT) vs. CC        | TT vs. (CT+CC)         | TT vs. CC               | CT vs. CC                 |
| COMT rs6267 (G>T)            | (GG*2+GT) vs. (TT*2+GT) | (TT+GT) vs. GG        | TT vs. (GT+GG)         | TT vs. GG               | GT vs. GG                 |
| EDN3 rs11570255 (G>A)        | (GG*2+GA) vs. (AA*2+GA) | (AA+GA) vs. GG        | AA vs. (GA+GG)         | AA vs. GG               | GA vs. GG                 |
| FAM129A rs28927681 (A>G)     | (AA*2+AG) vs. (GG*2+AG) | (GG+AG) vs. AA        | GG vs. (AG+AA)         | GG vs. AA               | AG vs. AA                 |
| RECQL4 rs4251691 (G>A)       | (GG*2+GA) vs. (AA*2+GA) | (AA+GA) vs. GG        | AA vs. (GA+GG)         | AA vs. GG               | GA vs. GG                 |
| SLC7A6OS rs8063446 (A>C)     | (AA*2+AC) vs. (CC*2+AC) | (CC+AC) vs. AA        | CC vs. (AC+AA)         | CC vs. AA               | AC vs. AA                 |
| SSPO rs12536873 (G>T)        | (GG*2+GT) vs. (TT*2+GT) | (TT+GT) vs. GG        | TT vs. (GT+GG)         | TT vs. GG               | GT vs. GG                 |
| SYT8 rs3741231 (C>G)         | (CC*2+CG) vs. (GG*2+CG) | (GG+CG) vs. CC        | GG vs. (CG+CC)         | GG vs. CC               | CG vs. CC                 |

**Supplementary Table3.** Quality control of pooled whole-exome sequencing

| Sample                                         | HC-pool  | IBS-pool  | DD-pool   |
|------------------------------------------------|----------|-----------|-----------|
| Total effective reads                          | 42682142 | 102321372 | 125776375 |
| Reads uniquely mapped to genome%               | 94.97    | 95.21     | 93.92     |
| Average read length (bp)                       | 150      | 150       | 147       |
| GC Content%                                    | 53.00    | 54.32     | 52.00     |
| Mismatch rate in target region%                | 0.33     | 0.33      | 0.30      |
| Mismatch rate in all effective sequence%       | 0.30     | 0.29      | 0.29      |
| Base covered on target                         | 60429893 | 60448083  | 60446770  |
| Coverage of target region%                     | 99.96    | 99.99     | 99.98     |
| Base covered near target                       | 92590612 | 95557787  | 92465081  |
| Coverage of flanking region%                   | 95.18    | 98.23     | 95.05     |
| Fraction of target covered with at least 4x%   | 99.68    | 99.93     | 99.94     |
| Fraction of target covered with at least 10x%  | 98.17    | 99.71     | 99.79     |
| Fraction of target covered with at least 20x%  | 99.49    | 98.78     | 99.28     |
| Fraction of target covered with at least 100x% | 91.01    | 85.54     | 81.28     |

Note: IBS: irritable bowel syndrome; DD: depressive disorder; HC: healthy control; G: guanine; C: cytosine

**Supplementary Table4.** Quality control of pooled whole-exome sequencing

| Group  | Gene            | avsnp150    | AltF   | ClinVar                      |
|--------|-----------------|-------------|--------|------------------------------|
| HI; HD | <i>COL6A1</i>   | rs13051496  | 0.0615 | Collagen VI-related myopathy |
| HI; HD | <i>FAM129A</i>  | rs28927681  | 0.0823 | Not Reported                 |
| HI; HD | <i>SSPO</i>     | rs12536873  | 0.2361 | Not Reported                 |
| HI; HD | <i>SYT8</i>     | rs3741231   | 0.3026 | Not Reported                 |
| HI     | <i>ANKRD11</i>  | rs113527563 | 0.245  | Not Reported                 |
| HI     | <i>RECQL4</i>   | rs4251691   | 0.4762 | Not Reported                 |
| HI     | <i>SLC7A6OS</i> | rs8063446   | 0.0575 | Not Reported                 |
| HD     | <i>COMT</i>     | rs6267      | 0.0347 | Schizophrenia                |
| HD     | <i>EDN3</i>     | rs11570255  | 0.0179 | Hirschsprung disease 4       |

Note: avsnp150: SNPs reference database; HI: IBS-pool compared with HC-pool; HD: DD-pool compared with HC-pool; AltF: frequency of altered variation in 1000 Genomes Asian population; ClinVar: Clinical Genome Resource.

**Supplementary Table 5.** Frequency of candidate variants validation

| SNVs                      | Detective rate<br>(%) | Genotype |     |     |     | HC        |
|---------------------------|-----------------------|----------|-----|-----|-----|-----------|
|                           |                       |          | HC  | IBS | DD  | $P_{HWE}$ |
| ANKRD11 rs113527563 (G>C) | 99.76                 | GG       | 79  | 62  | 86  | 0.21      |
|                           |                       | GC       | 49  | 51  | 57  |           |
|                           |                       | CC       | 13  | 9   | 7   |           |
| COL6A1 rs13051496 (C>T)   | 98.79                 | CC       | 105 | 106 | 129 | 0.57      |
|                           |                       | CT       | 29  | 15  | 19  |           |
|                           |                       | TT       | 4   | 1   | 2   |           |
| COMT rs6267 (G>T)         | 99.76                 | GG       | 121 | 100 | 131 | 0.01      |
|                           |                       | GT       | 1   | 0   | 0   |           |
|                           |                       | TT       | 1   | 1   | 0   |           |
| EDN3 rs11570255 (G>A)     | 99.76                 | GG       | 133 | 117 | 147 | 0.82      |
|                           |                       | GA       | 7   | 5   | 3   |           |
|                           |                       | AA       | 0   | 0   | 0   |           |
| FAM129A rs28927681 (A>G)  | 100.00                | AA       | 99  | 117 | 99  | 0.25      |
|                           |                       | AG       | 23  | 24  | 23  |           |
|                           |                       | GG       | 0   | 0   | 0   |           |
| RECQL4 rs4251691 (G>A)    | 99.76                 | GG       | 56  | 49  | 53  | 0.83      |
|                           |                       | GA       | 77  | 79  | 54  |           |
|                           |                       | AA       | 17  | 13  | 15  |           |
| SLC7A6OS rs8063446 (A>C)  | 99.76                 | AA       | 108 | 102 | 134 | 0.32      |
|                           |                       | AC       | 30  | 20  | 16  |           |
|                           |                       | CC       | 1   | 0   | 0   |           |
| SSPO rs12536873 (G>T)     | 99.52                 | GG       | 71  | 68  | 71  | 0.96      |
|                           |                       | GT       | 44  | 66  | 44  |           |
|                           |                       | TT       | 7   | 7   | 7   |           |
| SYT8 rs3741231 (C>G)      | 95.16                 | CC       | 90  | 80  | 119 | 0.01      |
|                           |                       | CG       | 0   | 0   | 0   |           |
|                           |                       | GG       | 17  | 12  | 15  |           |

Note:  $P_{HWE}$ : significance of H-W equilibrium analysis in healthy control

**Supplementary Table 6. Minor allele frequency of candidate SNPs**

|                             | HC    | IBS   | DD    | Eastern Asian |
|-----------------------------|-------|-------|-------|---------------|
| ANKRD11rs113527563<br>(G>C) | 0.266 | 0.283 | 0.237 | 0.245         |
| COL6A1rs13051496 (C>T)      | 0.077 | 0.070 | 0.134 | 0.062         |
| COMTrs6267 (G>T)            | 0.012 | 0.010 | 0.000 | 0.035         |
| EDN3rs11570255 (G>A)        | 0.021 | 0.025 | 0.010 | 0.018         |
| FAM129Ars28927681<br>(A>G)  | 0.094 | 0.085 | 0.097 | 0.082         |
| RECQL4rs4251691 (G>A)       | 0.344 | 0.372 | 0.370 | 0.476         |
| SLC7A6OSrs8063446<br>(A>C)  | 0.082 | 0.115 | 0.053 | 0.058         |
| SSPOrs12536873 (G>T)        | 0.238 | 0.284 | 0.211 | 0.236         |
| SYT8rs3741231 (C>G)         | 0.130 | 0.159 | 0.112 | 0.303         |

Note: 1000 Genomes of Eastern Asian, Released July 9, 2019
